# Supplementary material for: Monoallelic CRMP1 gene variants cause neurodevelopmental disorder
Source: eLife journal article supplement (doi:10.7554/elife.80793), 2022-12-13
Supplement: supp [file Fig 2D Signal intensity.xlsx]

## Sheet: Sheet1
Fig 2D CRMP1 wildtype and variant co-IP original data and repeated ANOVA
	band	band	signal intensity
Exp 1	area size	density	area*density		IP/input ratio
IP wt	0.019	118.024	2.24246	wt	0.598368
IP TM	0.012	23.389	0.280668	TM	0.110306
IP PL	0.012	51.83	0.62196	PL	0.29915
input wt	0.02	187.381	3.74762
input TM	0.017	149.674	2.54446
input PL	0.018	115.505	2.07909
Exp 2	area size	density	area*density		IP/input ratio
IP wt	0.015	170.608	2.55912	wt	0.682187
IP TM	0.01	81.892	0.81892	TM	0.38435
IP PL	0.012	58.528	0.702336	PL	0.424215
input wt	0.023	163.102	3.75135
input TM	0.017	125.333	2.13066
input PL	0.017	97.389	1.65561
Exp 3	area size	density	area*density		IP/input ratio
IP wt	0.018	159.169	2.86504	wt	0.744092
IP TM	0.014	35.809	0.501326	TM	0.26697
IP PL	0.015	24.103	0.361545	PL	0.1999
input wt	0.027	142.607	3.85039
input TM	0.014	134.131	1.87783
input PL	0.021	86.125	1.80863
Exp 4	area size	density	area*density		IP/input ratio
IP wt	0.018	147.415	2.65347	wt	0.678126
IP TM	0.017	53.424	0.908208	TM	0.548732
IP PL	0.013	49.673	0.645749	PL	0.62246
input wt	0.026	150.498	3.91295
input TM	0.016	103.444	1.6551
input PL	0.014	74.101	1.03741
Exp 5	area size	density	area*density		IP/input ratio
IP wt	0.023	161.996	3.72591	wt	2.21014
IP TM	0.016	147.013	2.35221	TM	1.07417
IP PL	0.013	136.619	1.77605	PL	1.48234
input wt	0.016	105.364	1.68582
input TM	0.017	128.811	2.18979
input PL	0.012	99.845	1.19814
Exp 6	area size	density	area*density		IP/input ratio
IP wt	0.021	159.697	3.35364	wt	1.79643
IP TM	0.016	139.242	2.22787	TM	0.967684
IP PL	0.012	98.175	1.1781	PL	1.03016
input wt	0.016	116.677	1.86683
input TM	0.018	127.904	2.30227
input PL	0.014	81.686	1.1436
myc-IP/input ratio summary table
	wt	TM	PL
Exp 1	0.598368	0.110306	0.29915
Exp 2	0.682187	0.38435	0.424215
Exp 3	0.744092	0.26697	0.1999
Exp 4	0.678126	0.548732	0.62246
Exp 5	2.21014	1.07417	1.48234
Exp 6	1.79643	0.967684	1.03016
Table Analyzed	Data 1
Repeated measures ANOVA summary
Assume sphericity?	Yes
F	12.99
P value	0.0017
P value summary	**
Statistically significant (P < 0.05)?	Yes
R squared	0.7221
Was the matching effective?
F	19.93
P value	<0.0001
P value summary	****
Is there significant matching (P < 0.05)?	Yes
R squared	0.7347
ANOVA table	SS	DF	MS	F (DFn, DFd)	P value
Treatment (between columns)	1.044	2	0.5221	F (2, 10) = 12.99	P=0.0017
Individual (between rows)	4.005	5	0.8009	F (5, 10) = 19.93	P<0.0001
Residual (random)	0.4019	10	0.04019
Total	5.451	17
Data summary
Number of treatments (columns)	3
Number of subjects (rows)	6
Number of missing values	0
Multiple comparisons
Number of families	1
Number of comparisons per family	3
Alpha	0.05
Tukey's multiple comparisons test	Mean Diff.	95.00% CI of diff.	Below threshold?	Summary	Adjusted P Value
wt vs. TM	0.5595	0.2423 to 0.8768	Yes	**	0.0018	A-B
wt vs. PL	0.4419	0.1246 to 0.7591	Yes	**	0.0086	A-C
TM vs. PL	-0.1177	-0.4349 to 0.1996	No	ns	0.5836	B-C
Test details	Mean 1	Mean 2	Mean Diff.	SE of diff.	n1	n2	q	DF
wt vs. TM	1.118	0.5587	0.5595	0.1157	6	6	6.837	10
wt vs. PL	1.118	0.6764	0.4419	0.1157	6	6	5.399	10
TM vs. PL	0.5587	0.6764	-0.1177	0.1157	6	6	1.438	10
