# Supplementary material for: Monoallelic CRMP1 gene variants cause neurodevelopmental disorder
Source: eLife journal article supplement (doi:10.7554/elife.80793), 2022-12-13
Supplement: supp [file Fig 3E Neurite length.xlsx]

## Sheet: Sheet1
Fig 3E Effect of CRMP1 variants on neurite growth, original data and ANOVA
	longest primary neurite (µm)
	wt	T313M	P475L	tdTomato
Exp 1	685.089	642.178	281.662	375.355
		534.095		782.673
	1191.37		412.218
	439.873	267.788	341.119	421.714
				650.328
	870.667	106.321	65.9902
		87.446	465.389	809.739
	1029.03			885.704
		425.974	492.524
	749.966			305.05
		227.728	157.396	333.673
	992.55
		265.897	539.949	535.93
	439.19			960.543
	1038.11	843.346	338.459
				431.769
	1091.5	554.241	114.947	630.432
				307.488
	1294.43	889.098
		226.649		666.898
	489.359			328.56
	922.27	71.7155
		204.974		722.258
		244.835		442.323
				460.395
				545.281
				156.675
				349.41
				511.804
				620.239
Exp 2	405.506	523.45	149.125	325.716
	135.679			522.446
		782.875	125.499
	542.012			836.805
		221.271	112.729	952.837
	631.547	240.001		346.228
	270.814		149.041
		156.675		199.249
	907.975	307.986	403.487
				491.191
	753.389	103.438	236.612
				441.325
	718.149	518.326	97.7887
	116.898			660.604
		492.427	337.442	527.865
	815.451
		88.5567	366.914	910.196
	898.072		370.058	534.569
		108.641
	708.009		488.665	264.988
		348.502
	1155			347.371
		484.804
	668.615			909.037
	492.733	300.475
				579.197
	386.692
				385.542
Exp 3	587.165	432.936	165.266	155.756
	659.755			247.206
		249.233	211.827
	728.771	94.334		458.563
	531.926		375.338	672.406
		299.089
	365.618		106.154	447.652
		213.332
	816.579	252.284	453.057	102.741
	166.202			325.6
		102.689	61.2227
	1022.44			527.385
		407.112	117.343	328.213
	144.869	139.464	132.266
	292.799			300.426
		328.206	80.1397
	265.04			324.647
	459.486	152.109	146.091
			108.163	513.378
	86.9512	121.658
	397.601	199.436	634.583	206.405
	339.134	252.363	84.6461	228.72
	719.658	75.3405	400.002
				92.1961
	626.245	369.046	113.007	137.89
				144.475
Exp 4	1029.01	282.139	108.961	579.263
	470.772	541.485	167.056
	533.099			673.319
		240.05	153.715
	659.518	253.948	143.626	515.039
	400.248	421.426
			62.3508	558.681
	632.46	312.298	211.827
	351.159	299.803
	385.678	478.11	176.438	450.567
		298.761	172.597
	1105.94			643.066
	629.171	110.577	254.101	687.197
		183.065	313.558
	476.682	140.833		562.663
	417.87		214.391
	601.485	88.8423	575.67	292.708
		451.602	209.323
	648.74	95.3091		439.701
	752.783	433.361
	398.298			189.104
		124.977
	236.679	245.795		1618.63
	504.811	582.24
	258.538			493.127
	679.992
				755.256
				549.902
				300.652
average	609.441	305.359	244.893	493.04
StDev	288.877	191.241	153.062	252.583
N	66	64	49	73
Table Analyzed	combined longest primary neurite data
Data sets analyzed	A-D
ANOVA summary
F	31.27
P value	<0.0001
P value summary	****
Significant diff. among means (P < 0.05)?	Yes
R squared	0.2745
Brown-Forsythe test
F (DFn, DFd)	6.302 (3, 248)
P value	0.0004
P value summary	***
Are SDs significantly different (P < 0.05)?	Yes
Bartlett's test
Bartlett's statistic (corrected)	25.17
P value	<0.0001
P value summary	****
Are SDs significantly different (P < 0.05)?	Yes
ANOVA table	SS	DF	MS	F (DFn, DFd)	P value
Treatment (between columns)	5087056	3	1695685	F (3, 248) = 31.27	P<0.0001
Residual (within columns)	13446375	248	54219
Total	18533431	251
Data summary
Number of treatments (columns)	4
Number of values (total)	252
Multiple comparisons
Number of families	1
Number of comparisons per family	6
Alpha	0.05
Tukey's multiple comparisons test	Mean Diff.	95.00% CI of diff.	Below threshold?	Summary	Adjusted P Value
wt vs. T313M	304.1	198.4 to 409.7	Yes	****	<0.0001	A-B
wt vs. P475L	364.5	251.0 to 478.1	Yes	****	<0.0001	A-C
wt vs. tdTomato	116.4	14.10 to 218.7	Yes	*	0.0186	A-D
T313M vs. P475L	60.47	-53.86 to 174.8	No	ns	0.5206	B-C
T313M vs. tdTomato	-187.7	-290.8 to -84.55	Yes	****	<0.0001	B-D
P475L vs. tdTomato	-248.1	-359.4 to -136.9	Yes	****	<0.0001	C-D
Test details	Mean 1	Mean 2	Mean Diff.	SE of diff.	n1	n2	q	DF
wt vs. T313M	609.4	305.4	304.1	40.85	66	64	10.53	248
wt vs. P475L	609.4	244.9	364.5	43.91	66	49	11.74	248
wt vs. tdTomato	609.4	493	116.4	39.55	66	73	4.162	248
T313M vs. P475L	305.4	244.9	60.47	44.2	64	49	1.935	248
T313M vs. tdTomato	305.4	493	-187.7	39.87	64	73	6.657	248
P475L vs. tdTomato	244.9	493	-248.1	43	49	73	8.161	248
